# Supplementary material for: The in vivo dsRNA Cleavage Has Sequence Preference in Insects
Source: Front Physiol. 2018 Dec 10;9:1768. doi: 10.3389/fphys.2018.01768 (PMC6295558; doi:10.3389/fphys.2018.01768)
Supplement: Supplementary file 4 [file Table_4.XLSX]

## Sheet: Sheet1
Supplementary Table 4. Mapped small RNAs can map on target dsRNA in untreated control (CK).
Sample name	Tag type	Tag number
dsREase	433	956
dsREase-800	0	0
dsREase-400A	357	730
dsREase-400B	328	761
O.furn dsREase-800	0	0
O.furn dsREase-800M	0	0
O.furn dsEGFP-720	505	1090
